# Supplementary material for: Integration of Multiple Heterointerfaces in a Hierarchical 0D@2D@1D Structure for Lightweight, Flexible, and Hydrophobic Multifunctional Electromagnetic Protective Fabrics
Source: PubMed Central journal article supplement (PMC10457279; doi:10.1007/s40820-023-01179-2), 2023-08-25
Supplement: 40820_2023_1179_MOESM1_ESM.pdf [file 40820_2023_1179_MOESM1_ESM.pdf]

Supporting Information for

## Integration of Multiple Heterointerfaces in a Hierarchical 0D@2D@1D Structure for Lightweight, Flexible, and Hydrophobic Multifunctional Electromagnetic Protective Fabrics

Shuo Zhang<sup>1, #</sup>, Xuehua Liu<sup>1, #</sup>, Chenyu Jia<sup>1</sup>, Zhengshuo Sun<sup>1</sup>, Haowen Jiang<sup>1</sup>, Zirui Jia<sup>2, \*</sup>, Guanglei Wu<sup>1, \*</sup>

<sup>1</sup> Institute of Materials for Energy and Environment, State Key Laboratory of Bio-fibers and Eco-textiles, College of Materials Science and Engineering, Qingdao University, Qingdao 266071, P. R. China

<sup>2</sup> College of Chemistry and Chemical Engineering, Qingdao University, Qingdao 266071, P. R. China

# Zirui Jia and Guanglei Wu contributed equally to this work.

\*Corresponding authors. E-mail: [jiazirui@qdu.edu.cn](mailto:jiazirui@qdu.edu.cn) (Z. Jia),  
[wuguanglei@qdu.edu.cn/wuguanglei@mail.xjtu.edu.cn](mailto:wuguanglei@qdu.edu.cn/wuguanglei@mail.xjtu.edu.cn) (G. Wu)

### Supplementary Figures

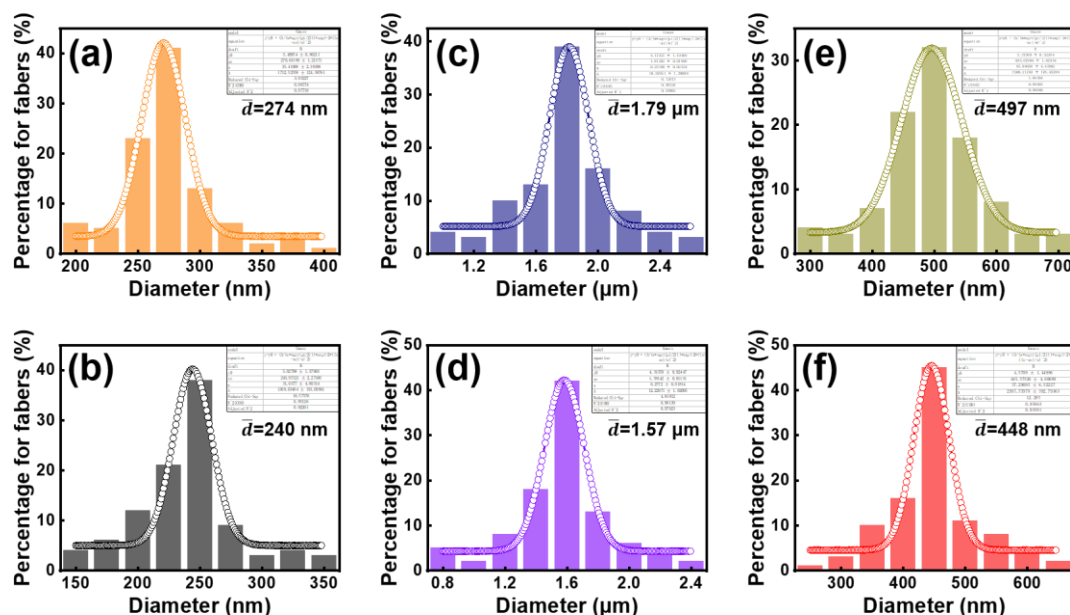

**Fig. S1** Statistical histogram of diameter of (a) PAN NFs, (b) CNFs, (c) Co-ZIF/PAN, (d) CCC, (e) CoNi-ZIF/PAN, and (f) CNCC fibrous composites

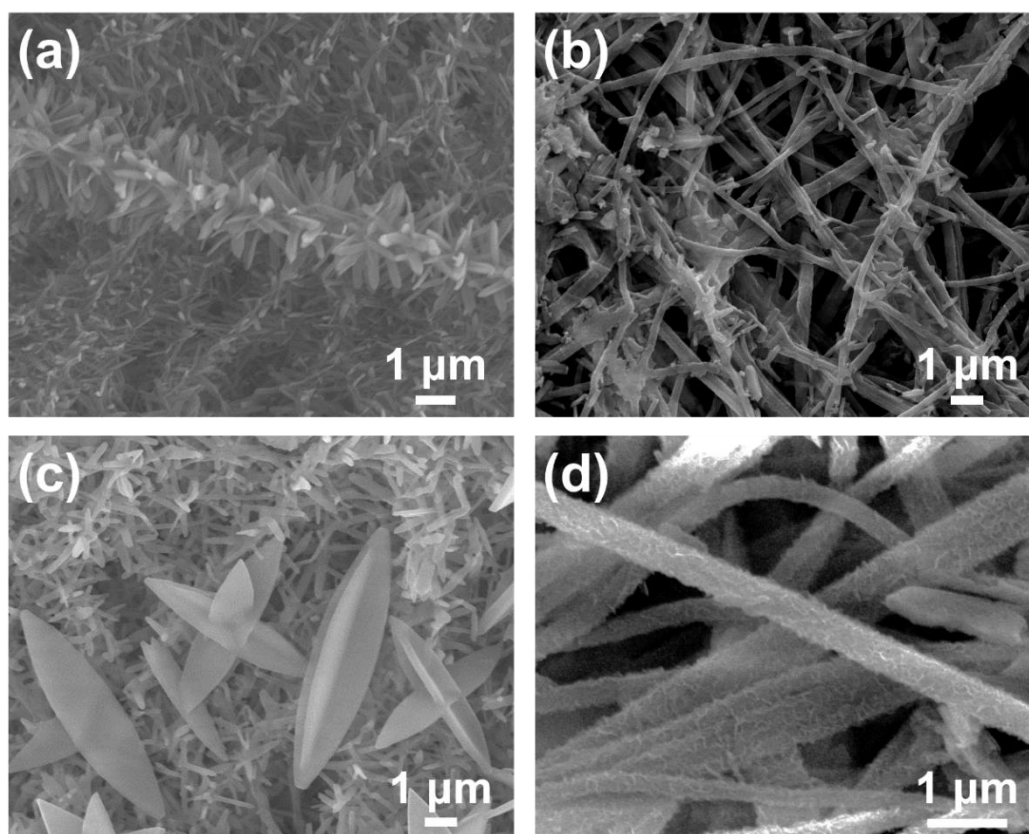

**Fig. S2** SEM images of (a) Co-ZIF/PAN ( $\text{Co}^{2+}$ :2-MI=1:8), (b) Co-ZIF/PAN ( $\text{Co}^{2+}$ :2-MI=1:0), (c) Co-ZIF/PAN ( $\text{Co}^{2+}$ :2-MI=1:16), and (d) CoNi-ZIF/PAN

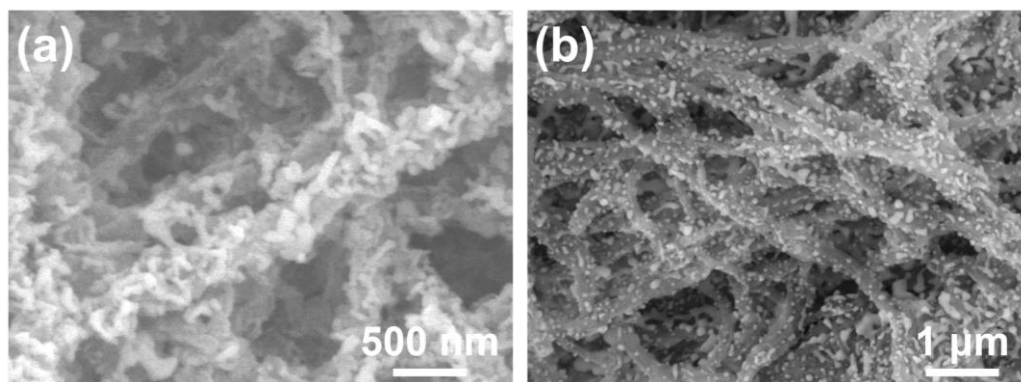

**Fig. S3** SEM images of (a) Co-ZIF/PAN and (b) CoNi-ZIF/PAN directly selenized without pre-carbonization

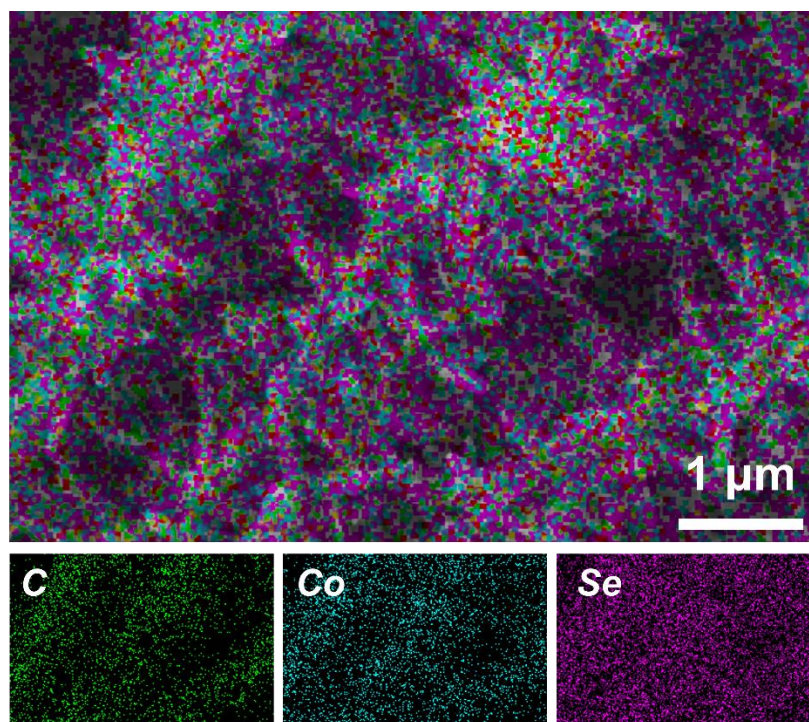

**Fig. S4** EDS mapping of sample CCC

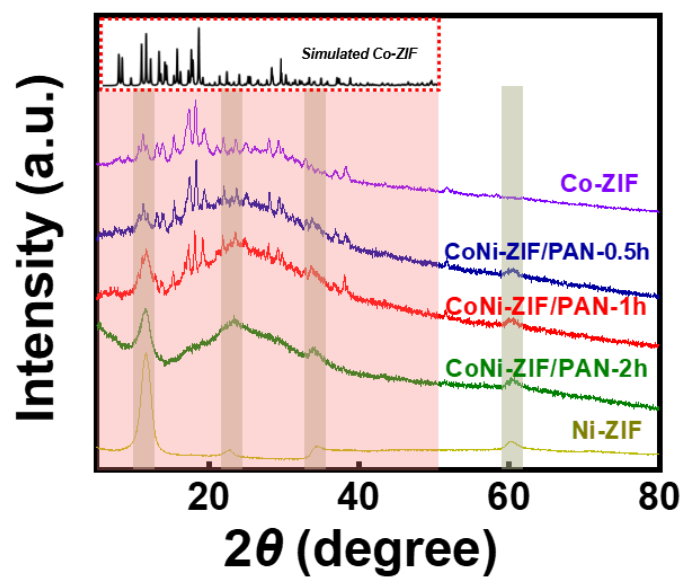

**Fig. S5** XRD patterns of single component Co-ZIF, Ni-ZIF and CoNi-ZIF/PAN treated with different sonication times



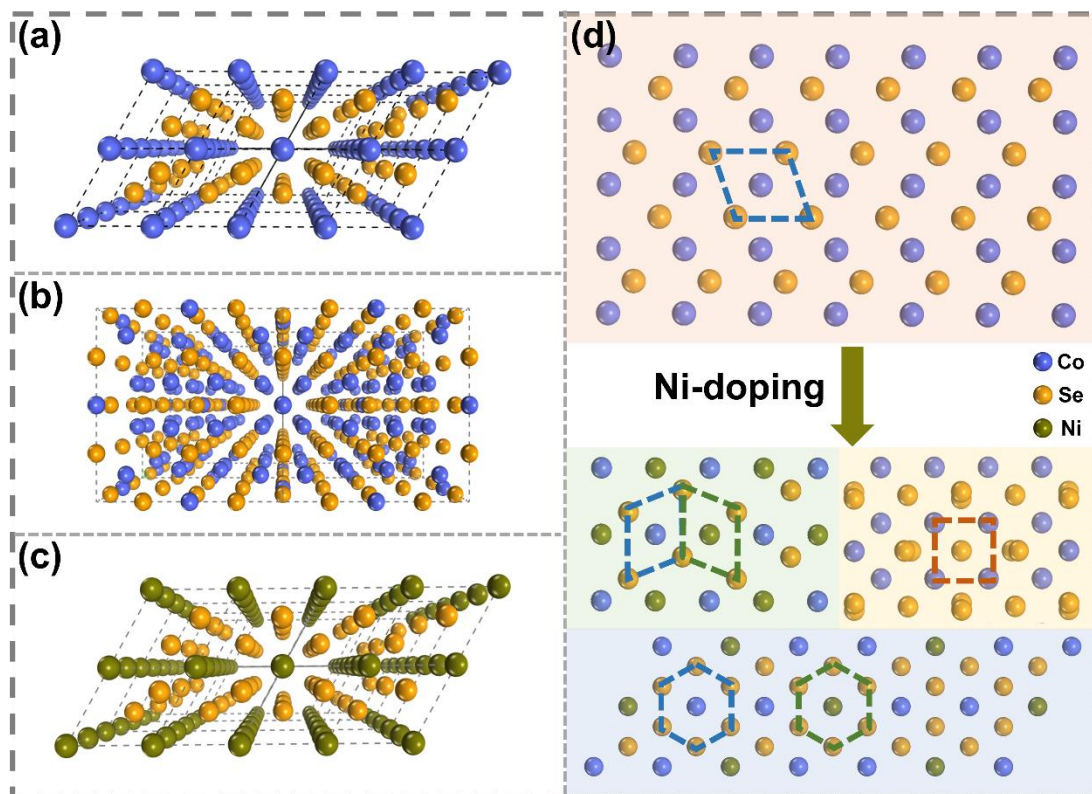

**Fig. S6** The crystal structure models of (a) hexagonal CoSe, (b) tetragonal Co<sub>9</sub>Se<sub>8</sub>, (c) hexagonal NiSe, and (d) schematic diagram of the effect of nickel introduction on material transformation

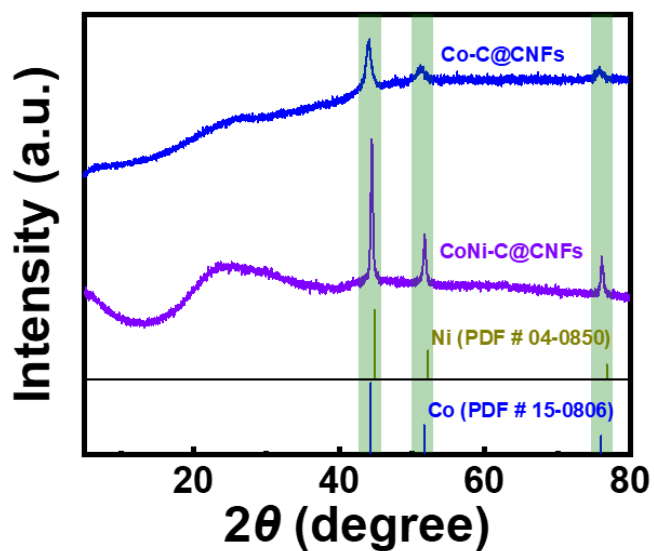

**Fig. S7** XRD patterns of Co-C@CNFs and CoNi-C@CNFs

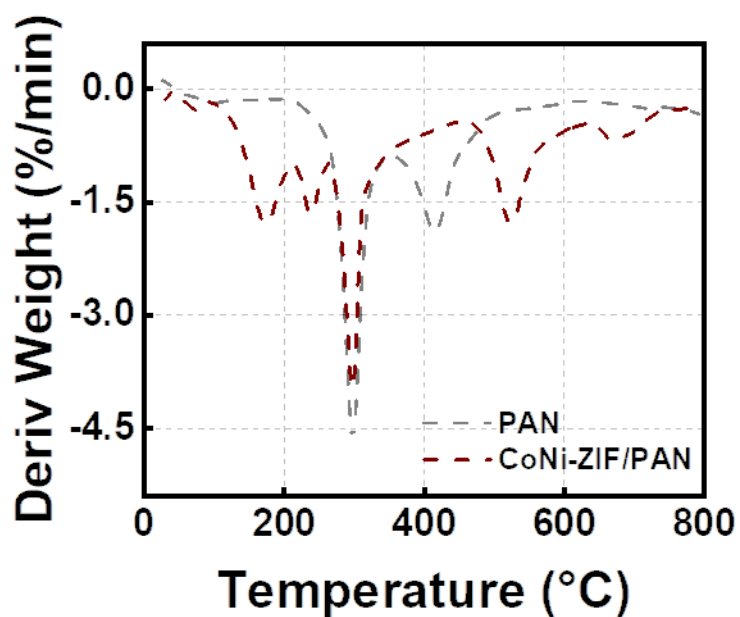

Fig. S8 DTG curves of PAN and CoNi-ZIF/PAN

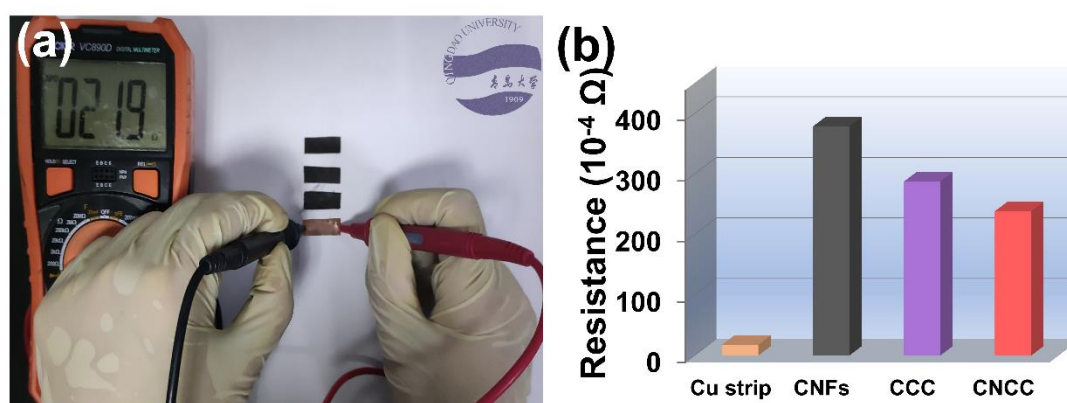

Fig. S9 (a) Schematic diagram of surface resistance test of copper strip and various fibrous membranes (the figure shows the test data of copper strip with unpolished surface), (b) the statistical histogram of surface resistance test values of all samples

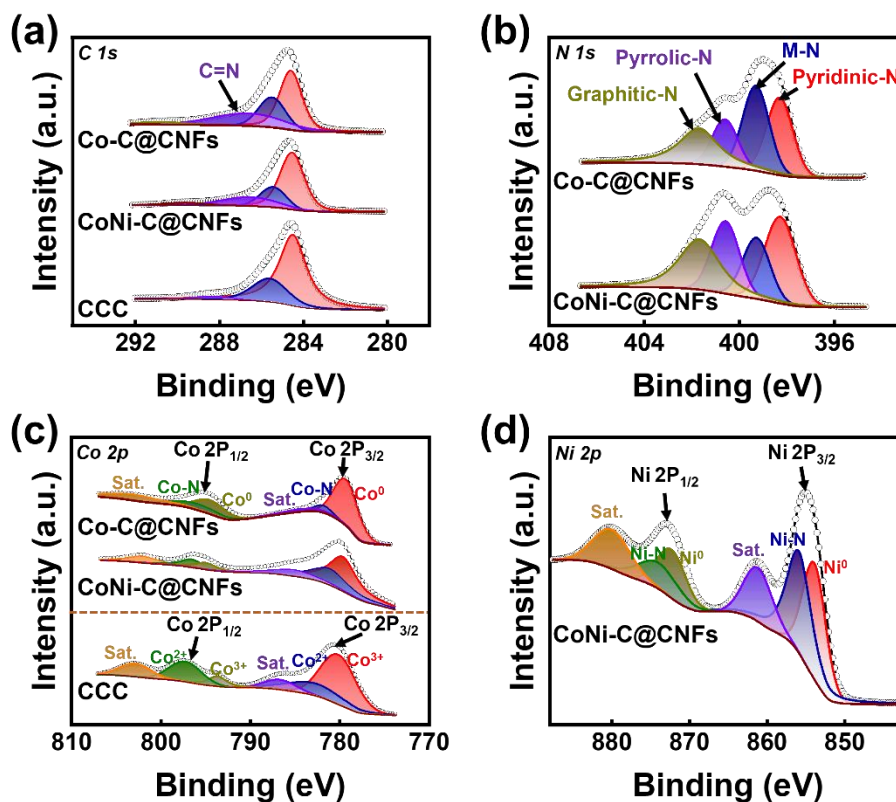

**Fig. S10** High-resolution XPS patterns of samples Co-C@CNFs, CoNi-C@CNFs and CCC: (a) C 1s, (b) N 1s, (c) Co 2p and (d) Ni 2p

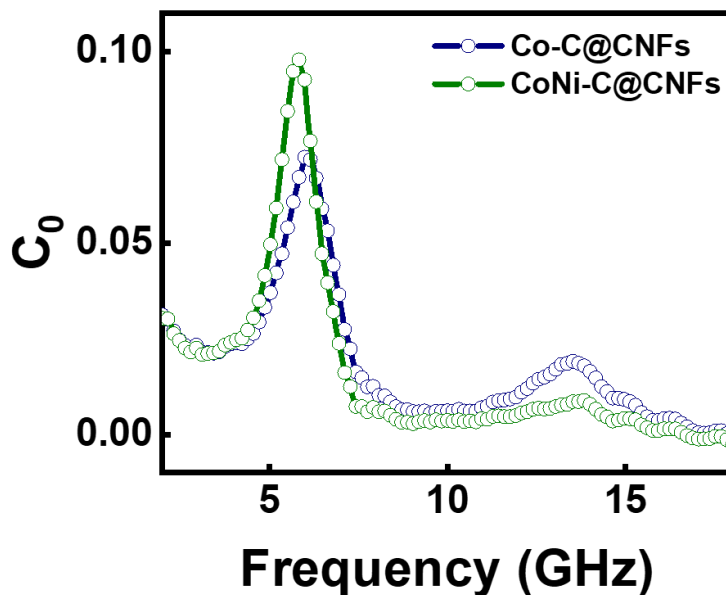

**Fig. S11** The  $C_0$  curves of Co-C@CNFs and CoNi-C@CNFs

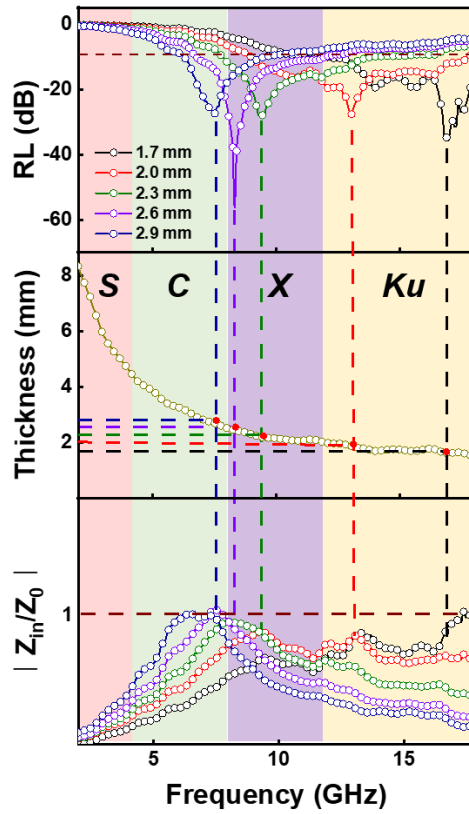

**Fig. S12** The dependence plot of  $\lambda/4$  matching thickness vs RL peak vs  $|Z_{in}/Z_0|$  of the sample CNCC

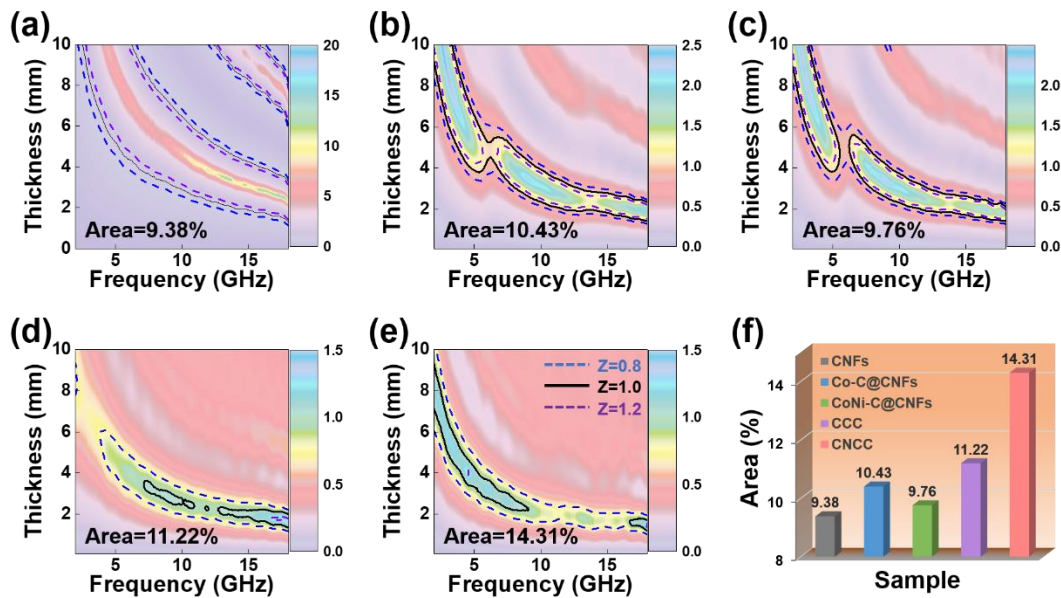

**Fig. S13** Contour map of the values of  $Z$  of (a) CNFs, (b) Co-C@CNFs, (c) CoNi-C@CNFs, (d) CCC, (e) CNCC, and (f) the percentage of area occupied by the specific impedance matching interval ( $0.8 < Z < 1.2$ )

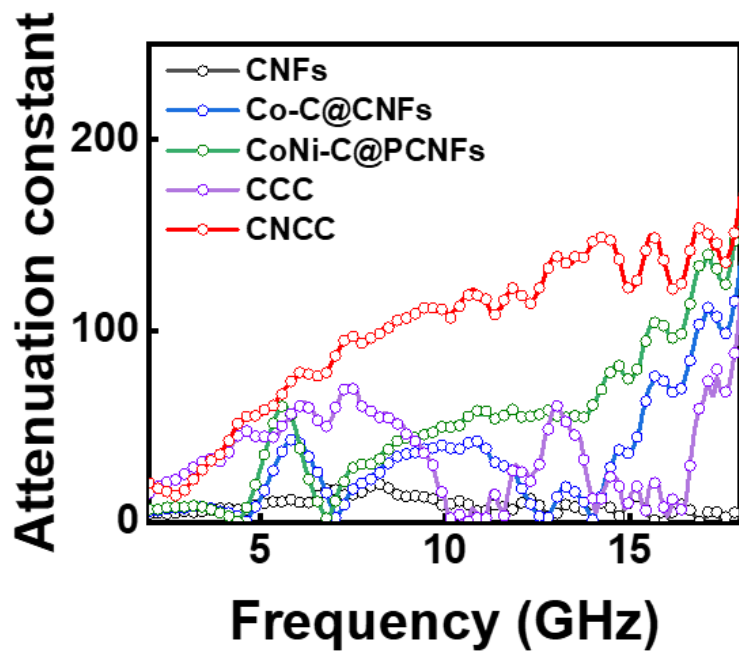

Fig. S14 The attenuation constant curves of all samples

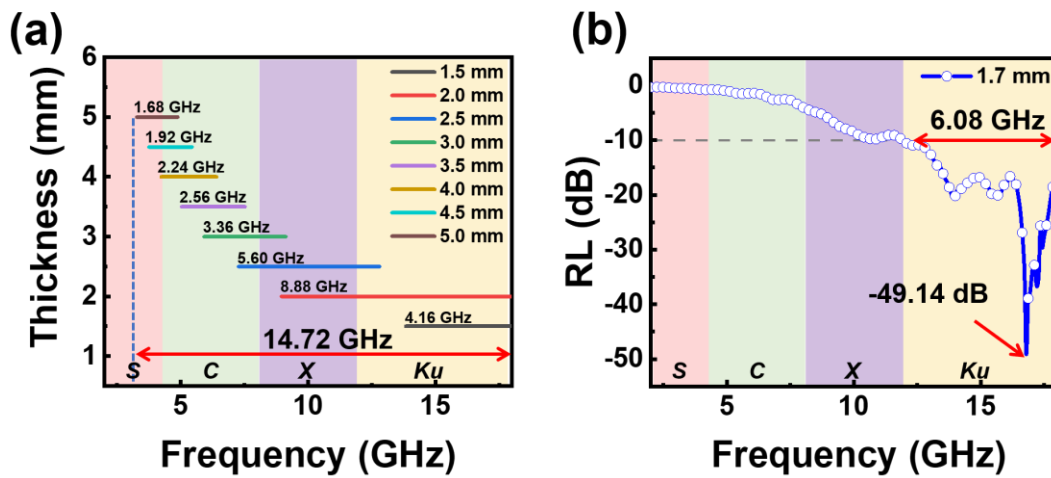

Fig. S15 (a) Effective absorption bandwidth values of the sample CNCC at different thicknesses and (b) dependence of the reflection loss value on frequency at 1.7 mm



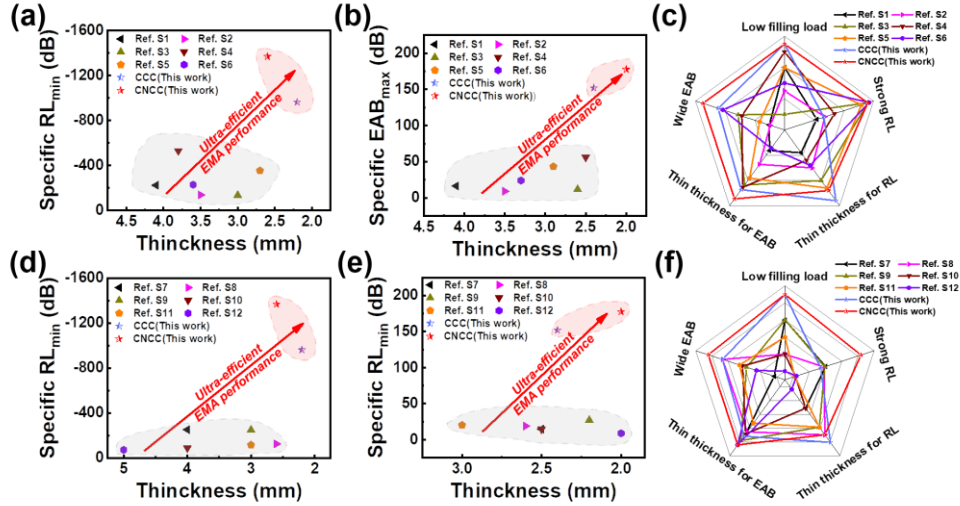

**Fig. S16** Ultra-efficient electromagnetic wave absorbers: scatter plots of (a) specific RL values versus thickness, (b) specific EAB values versus thickness, and (c) radar comparison chart of typical 1D composite absorbers reported in the literature and in this work, scatter plots of (d) specific RL values versus thickness, (e) specific EAB values versus thickness, and (f) radar comparison chart of typical MOF-derived composite absorbers reported in the literature and in this work

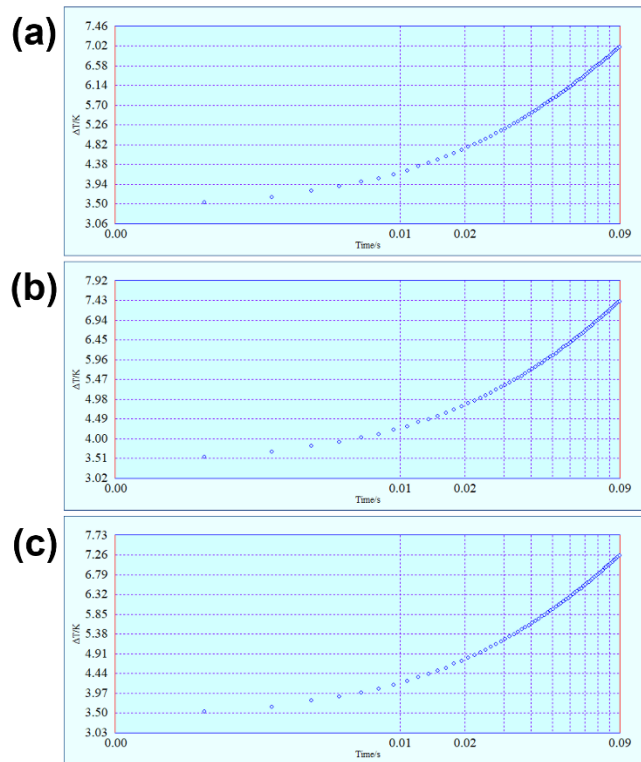

**Fig. S17** The temperature difference curves between the upper and lower surfaces of various fibrous membranes on the surface of the thermal conductivity test bench within 0-0.09 s: (a) commercial CFs membrane, (b) CCC fibrous membrane, and (c) CNCC fibrous membrane

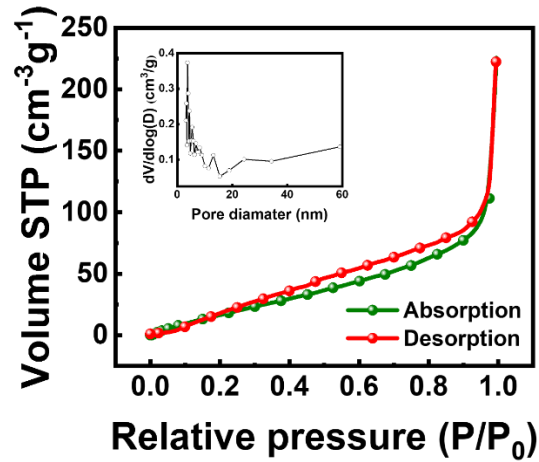

**Fig. S18** N<sub>2</sub> adsorption–desorption isotherm curve of CNCC fibrous composite (inset: the corresponding pore size distribution curve)

**Table S1** Surface resistance test data for copper tape and various fibrous composites

| Sample       | Resistance (10 <sup>-4</sup> Ω) |       |       |       |       | Length (cm) | Width (mm) | Thickness (mm) | Cross-sectional area (mm <sup>2</sup> ) |
|--------------|---------------------------------|-------|-------|-------|-------|-------------|------------|----------------|-----------------------------------------|
| Copper strip | 17.9                            | 17.6  | 18.1  | 17.3  | 18.2  | 2           | 5          | 0.05           | 0.25                                    |
| CNFs         | 377.1                           | 379.2 | 378.4 | 377.6 | 378.7 | 2           | 5          | 0.10           | 0.50                                    |
| CCC          | 286.2                           | 287.3 | 286.7 | 288.1 | 287.8 | 2           | 5          | 0.11           | 0.55                                    |
| CNCC         | 239.4                           | 237.8 | 238.7 | 237.1 | 238.3 | 2           | 5          | 0.11           | 0.55                                    |

**Table S2** Surface element content of various samples (at%)

| Sample      | C     | O    | N    | Co   | Ni   | Se    |
|-------------|-------|------|------|------|------|-------|
| Co-C@CNFs   | 80.27 | 7.92 | 8.06 | 3.75 | 0    | 0     |
| CoNi-C@CNFs | 77.56 | 8.47 | 6.85 | 3.51 | 3.61 | 0     |
| CCC         | 81.66 | 5.28 | 1.85 | 5.29 | 0    | 5.92  |
| CNCC        | 72.68 | 6.08 | 1.28 | 4.85 | 4.99 | 10.12 |

**Table S3** Comparison of the EMA performance with other typical 1D materials

| Sample                                                 | Content (wt.%) | RL <sub>min</sub> (dB) | EAB (GHz)     | Refs.            |
|--------------------------------------------------------|----------------|------------------------|---------------|------------------|
| P-CNF/Fe                                               | 20             | -44.86 (4.1 mm)        | 3.28 (4.1 mm) | S1 [S1]          |
| HCSS/ZrO <sub>2</sub> /SiC                             | 35             | -48.6 (3.5 mm)         | 3.2 (3.5 mm)  | S2 [S2]          |
| ZnO/Co nanotubes                                       | 50             | -68.4 (3.0 mm)         | 5.9 (2.6 mm)  | S3 [S3]          |
| CNT@Ti <sub>3</sub> SiC <sub>2</sub> @SiC <sub>r</sub> | 10             | -53 (3.8 mm)           | 5.6 (2.5 mm)  | S4 [S4]          |
| Cu <sub>9</sub> S <sub>5</sub> /C NFs                  | 20             | -65.4 (2.7 mm)         | 4.1 (2.9 mm)  | S5 [S5]          |
| MnS/C NFs                                              | 30             | -68.9 (3.6 mm)         | 7.2 (3.3 mm)  | S6 [S6]          |
| CCC                                                    | 5              | -48.07 (2.2 mm)        | 7.6 (2.4 mm)  | <b>This work</b> |
| CNCC                                                   | 5              | -68.40 (2.6 mm)        | 8.88 (2.0 mm) | <b>This work</b> |

**Table S4** Comparison of the EMA performance with other typical powdery MOF-derived materials

| Sample                        | Content (wt.%) | RL <sub>min</sub> (dB) | EAB (GHz)     | Refs.            |
|-------------------------------|----------------|------------------------|---------------|------------------|
| SiC/Ni/NiO/C                  | 20             | -50.52 (4.0 mm)        | 2.96 (2.5 mm) | S7 [S7]          |
| Co/Ni/C                       | 40             | -49.8 (2.6 mm)         | 7.6 (2.6 mm)  | S8 [S8]          |
| Ag@C                          | 20             | -50.14 (3.0 mm)        | 5.44 (2.5 mm) | S9 [S9]          |
| Co/C                          | 40             | -35.3 (4.0 mm)         | 5.8 (2.5 mm)  | S10 [S10]        |
| NDC/MoS <sub>2</sub>          | 30             | -34.94 (3.0 mm)        | 6.08 (3.0 mm) | S11 [S11]        |
| ZnCo@C@1T-2H-MoS <sub>2</sub> | 50             | -35.83 (5.0 mm)        | 4.56 (2.0 mm) | S12 [S12]        |
| CCC                           | 5              | -48.07 (2.2 mm)        | 7.6 (2.4 mm)  | <b>This work</b> |
| CNCC                          | 5              | -68.40 (2.6 mm)        | 8.88 (2.0 mm) | <b>This work</b> |

**Table S5** Mechanical properties test data of various fibrous membranes

| Sample | Width (mm) | Thickness (mm) | Stress (MPa) | Strain (%) |
|--------|------------|----------------|--------------|------------|
| CNFs   | 20         | 0.10           | 4.35         | 27.8       |
| CCC    | 20         | 0.11           | 5.68         | 59.3       |
| CNCC   | 20         | 0.11           | 6.16         | 55.7       |

## Supplementary References

- [S1] X.D. Zuo, P. Xu, C.Y. Zhang, M.Z. Li, X.Y. Jiang et al., Porous magnetic carbon nanofibers (P-CNF/Fe) for low-frequency electromagnetic wave absorption synthesized by electrospinning. *Ceram. Int.* **45**(4), 4474-4481 (2019). <https://doi.org/10.1016/j.ceramint.2018.11.127>
- [S2] B.J. Zhang, Y. Liu, X.L. Li, D. Su, H.M. Ji, Closed-cell ZrO<sub>2</sub>/SiC-based composite nanofibers with efficient electromagnetic wave absorption and thermal insulation properties. *J. Alloys Compd.* **927**, 167036 (2022). <https://doi.org/10.1016/j.jallcom.2022.167036>
- [S3] J. Qiao, D.M. Xu, L.F. Lv, X. Zhang, F.L. Wang et al., Self-assembled ZnO/Co hybrid nanotubes prepared by electrospinning for lightweight and high-performance electromagnetic wave absorption. *ACS Appl. Nano Mater.* **1**(9), 5297-5306 (2018). <https://doi.org/10.1021/acsanm.8b01303>
- [S4] Y.J. Zou, X.Z. Huang, B.H. Fan, Z.P. Tang, J.H. Zhou et al., Constructing hierarchical Ti<sub>3</sub>SiC<sub>2</sub> layer and carbon nanotubes on SiC fibers for enhanced electromagnetic wave absorption. *Ceram. Int.* **49**(5), 8048-8057 (2023). <https://doi.org/10.1016/j.ceramint.2022.10.323>
- [S5] S.M. Wu, J. Qiao, Y.X. Tang, X. Zhang, X.W. Meng et al., Heterogeneous Cu<sub>9</sub>S<sub>5</sub>/C nanocomposite fibers with adjustable electromagnetic parameters for efficient electromagnetic absorption. *J Colloid Interface Sci.* **630**, 47-56 (2023). <https://doi.org/10.1016/j.jcis.2022.10.075>

- [S6] J. Qiao, X. Zhang, C. Liu, Z.H. Zeng, Y.F. Yang et al., Facile synthesis of MnS nanoparticle embedded porous carbon nanocomposite fibers for broadband electromagnetic wave absorption. *Carbon* **191**, 525-534 (2022). <https://doi.org/10.1016/j.carbon.2022.02.024>
- [S7] R. Yang, J.Q. Yuan, C.H. Yu, K. Yan, Y. Fu et al., Efficient electromagnetic wave absorption by Sic/Ni/Nio/C nanocomposites. *J. Alloys Compd.* **816**, 152519 (2020). <https://doi.org/10.1016/j.jallcom.2019.152519>
- [S8] G. Liu, J.Q. Tu, C. Wu, Y.J. Fu, C.H. Chu et al., High-yield two-dimensional metal-organic framework derivatives for wideband electromagnetic wave absorption. *ACS Appl. Mater. Interfaces* **13**(17), 20459-20466 (2021). <https://doi.org/10.1021/acsami.1c00281>
- [S9] Y.H. Song, X.H. Liu, Z.G. Gao, Z.D. Wang, Y.H. Hu et al., Core-shell Ag@C spheres derived from Ag-MOFs with tunable ligand exchanging phase inversion for electromagnetic wave absorption. *J Colloid Interface Sci.* **620**, 263-272 (2022). <https://doi.org/10.1016/j.jcis.2022.04.012>
- [S10] Y.Y. Lu, Y.T. Wang, H.L. Li, Y. Lin, Z.Y. Jiang et al., MOF-derived porous Co/C nanocomposites with excellent electromagnetic wave absorption properties. *ACS Appl. Mater. Interfaces* **7**(24), 13604-13611 (2015). <https://doi.org/10.1021/acsami.5b03177>
- [S11] J.H. Luo, M.N. Feng, Z. Y. Dai, C. Y. Jiang, W. Yao et al., MoS<sub>2</sub> wrapped mof-derived n-doped carbon nanocomposite with wideband electromagnetic wave absorption. *Nano Res.* **15**(7), 5781-5789 (2022). <https://doi.org/10.1007/s12274-022-4411-6>
- [S12] R.R. Yu, Y.H. Xia, X.Y. Pei, D. Liu, S.K. Liu et al., Micro-flower like core-shell structured ZnCo@C@1T-2H-MoS<sub>2</sub> composites for broadband electromagnetic wave absorption and photothermal performance. *J Colloid Interface Sci.* **622**, 261-271 (2022). <https://doi.org/10.1016/j.jcis.2022.01.179>
